# Supplementary material for: Red blood cell distribution width: Genetic evidence for aging pathways in 116,666 volunteers
Source: PLoS One. 2017 Sep 28;12(9):e0185083. doi: 10.1371/journal.pone.0185083 (PMC5619771; doi:10.1371/journal.pone.0185083)
Supplement: S1 Table — (XLSX) [file pone.0185083.s001.xlsx]

## Sheet: rdw_qn.results.bolt.imputed.lea
UK Biobank analysis of RBC Distribution Width
	16,832,071 genetic variants (MAF>0.01) were analysed in 116,666 UK Biobank participants of white/British descent
	30,988 variants were significantly (p<5x10-8) associated with RDW
	194 significant signals after conditional analysis
	BP = base-pair (hg19/GRCh37)
	INFO = imputation quality
	SIGNAL = unique ID for this conditionally independent signal. Format: CHR _ LOCUS _ SIGNAL
	BETA = the association statistic with respect to ALLELE1 (i.e. ALLELE0 is the reference allele)
	SE = standard error
	P = p-value (P_BOLT_LMM)
		The above association statistics are after adjustment for the other signals on the same chromosome
	P_age_interaction = p-value for the variant*age interaction term in the model against RDW
SNP	CHR	BP	ALLELE1	ALLELE0	A1FREQ	INFO	signal	BETA	SE	P	P_age_interaction
rs1175550	1	3691528	A	G	0.768885	0.98529	1_1_1	0.0366979	0.00470922	1.9e-16	0.683111
1:3691997_AGTCAGCCTAGGGGCTGT_A	1	3691997	AGTCAGCCTAGGGGCTGT	A	0.986944	0.89117	1_1_2	-0.119834	0.0184063	4.5e-12	0.805969
rs11799474	1	22704191	T	G	0.824802	0.99816	1_2_3	0.0303989	0.00519654	5.9e-09	0.796961
rs2075995	1	23847464	C	A	0.498281	1	1_2_2	0.0331247	0.00394657	1.8e-16	0.154405
rs61777615	1	25732087	G	A	0.578571	0.980843	1_2_1	0.0399529	0.00403194	2.9e-24	0.171852
rs755249	1	39995074	C	T	0.765275	0.991193	1_3_1	-0.0354519	0.0046778	4.1e-14	0.20599
rs2047007	1	40427975	C	T	0.733879	0.980034	1_3_2	-0.0256297	0.00452661	2.4e-09	0.630911
rs710214	1	43439282	C	T	0.780394	0.989795	1_4_1	-0.0413256	0.00480492	1.5e-18	0.270869
rs10923398	1	118251175	A	C	0.816694	0.982845	1_5_1	0.0333861	0.00514953	2e-11	0.486323
rs2022003	1	158586966	A	T	0.72083	0.998194	1_6_1	-0.0438695	0.00440695	6.1e-25	0.224956
rs11265038	1	158595842	C	A	0.721019	0.989134	1_6_2	0.0267283	0.00477394	1.5e-09	0.878099
rs6691993	1	172426998	T	G	0.506575	0.987877	1_7_1	-0.0286035	0.00397327	6.5e-13	0.431631
rs17534202	1	203281175	G	C	0.464167	0.993128	1_8_2	0.0240075	0.00397513	4.8e-10	0.337591
rs10900586	1	203654085	G	A	0.0979313	0.987064	1_8_1	-0.0608923	0.00668005	3.4e-20	0.899993
rs35671561	1	205094546	CTT	C	0.327391	0.986329	1_8_3	0.0254575	0.00422553	9.9e-10	0.875462
rs701929	1	211846876	A	G	0.526476	0.989727	1_9_1	0.0244884	0.00397429	3.4e-09	0.492971
rs1546954	1	230303848	T	G	0.385697	0.996935	1_10_1	-0.0300215	0.00406856	6.3e-14	0.88822
rs10926973	1	243388370	A	T	0.644496	0.998403	1_11_1	-0.0224657	0.00413509	2.3e-08	0.916146
rs4925749	1	248038212	G	A	0.880666	0.995373	1_12_2	-0.0362109	0.00632916	1.1e-08	0.724096
rs3811444	1	248039451	C	T	0.666514	1	1_12_1	0.0664232	0.00419059	6.3e-59	0.734117
rs6730558	2	8756183	C	T	0.620151	0.993687	2_1_1	0.0561879	0.00409581	4.4e-43	0.875044
rs548688766	2	24196509	C	CT	0.82305	0.952914	2_2_1	0.0281018	0.00532023	3.3e-08	0.2496
rs10210385	2	58997712	T	C	0.631641	0.986391	2_3_2	-0.0231093	0.00413334	1.8e-08	0.743908
rs7606173	2	60725451	G	C	0.569133	1	2_3_1	0.040388	0.00399888	1.7e-25	0.00208697
rs4672497	2	62523565	C	G	0.779334	0.976623	2_3_3	0.0362264	0.00481797	6.8e-15	0.366392
rs140625215	2	64860029	CTTCAAA	C	0.667105	0.966935	2_4_1	-0.0292387	0.00426967	7.2e-13	0.653616
rs10710560	2	70153058	GT	G	0.873335	0.94277	2_5_1	-0.0354433	0.00612005	3.4e-09	0.688808
rs183034862	2	169313518	C	T	0.978337	0.876523	2_6_1	-0.102865	0.0144912	1.1e-12	0.435221
rs1877712	2	219168432	G	A	0.436622	0.990758	2_7_1	-0.0254583	0.00401292	3.1e-10	0.876884
rs11456863	3	12271918	A	AT	0.650472	0.991077	3_1_1	0.0235998	0.00416829	7.1e-09	0.84314
rs150803770	3	49469962	T	TTTTATTTATTTA	0.341265	0.953499	3_2_1	0.0214748	0.00428516	1.7e-08	0.0538956
rs577887768	3	132206403	A	ATTTTTTTTTTTTTTT	0.862881	0.988503	3_3_1	-0.0367742	0.00578926	3e-10	0.330983
rs2068229	3	141623304	A	G	0.730265	0.989374	3_4_1	-0.0314273	0.00448573	1.4e-11	0.822351
rs7636909	3	142260562	A	G	0.565768	0.999006	3_4_2	-0.0218884	0.00400723	2.7e-08	0.565991
rs360408	3	171338569	T	A	0.436507	0.961475	3_5_1	0.0416334	0.00407	1.7e-26	0.735758
rs143845082	3	171417570	G	A	0.995513	0.870174	3_5_4	-0.217064	0.0317742	4.6e-13	0.528476
rs149535568	3	171442535	C	A	0.995219	0.682098	3_5_3	-0.269962	0.0344744	9.3e-15	0.555689
rs6792151	3	171529935	T	G	0.150671	0.96759	3_5_5	0.0407307	0.00616824	5.9e-10	0.541989
rs35461662	3	171774012	T	A	0.421583	0.980559	3_5_2	-0.0328056	0.00405242	2.5e-17	0.605509
rs113635136	3	195802843	C	CA	0.762034	0.976497	3_6_1	-0.0688588	0.00470995	2.1e-51	0.465515
rs73210009	3	195830276	G	A	0.535108	0.987232	3_6_2	0.0280578	0.00463682	6.2e-11	0.654368
rs142278384	4	39960225	CT	C	0.303359	0.988401	4_1_1	-0.0250597	0.00434627	5.3e-10	0.853712
rs112421097	4	69736660	A	G	0.915074	0.799572	4_2_1	-0.0437953	0.007993	1.6e-08	0.619188
rs12505188	4	153662239	T	C	0.601147	0.990329	4_3_1	-0.0304884	0.00407293	3.1e-15	0.798953
rs368447685	5	1025649	T	C	0.931603	0.78386	5_1_5	0.0724178	0.00925688	7e-16	0.309047
rs117893233	5	1041433	C	T	0.995452	0.784559	5_1_6	0.245255	0.0332742	2.2e-15	0.779465
rs111910553	5	1058387	G	A	0.987839	0.986521	5_1_2	0.188622	0.0182351	5.3e-27	0.173105
rs11133613	5	1075051	A	G	0.0299445	1	5_1_3	0.109035	0.0117985	9.7e-22	0.66671
rs11952124	5	1076459	G	T	0.109767	0.869934	5_1_7	-0.0505895	0.00822156	1.1e-09	0.0894734
rs187282666	5	1093511	G	A	0.99452	0.954124	5_1_4	0.225183	0.0274584	1.9e-17	0.0876272
rs35188965	5	1104938	C	T	0.417705	1	5_1_1	0.0735561	0.00401202	1.3e-78	0.399718
rs11954023	5	36118981	G	C	0.609673	0.998248	5_2_1	-0.0222508	0.0040548	2.7e-08	0.713873
rs266428	5	72128767	G	A	0.316004	0.994024	5_3_1	0.0268684	0.00427121	4.1e-12	0.288271
rs7734927	5	127453735	T	A	0.24624	0.996263	5_4_1	-0.112536	0.00459864	1.6e-138	0.988371
rs10479001	5	131607721	C	T	0.958201	1	5_5_1	-0.0564112	0.00991359	1.1e-08	0.927461
rs2578377	5	153413390	C	T	0.367202	1	5_6_1	-0.026062	0.00411042	4.1e-10	0.772406
rs7735282	5	175616413	G	T	0.575727	0.992893	5_7_1	-0.0258509	0.00402009	2e-10	0.902826
rs35351985	6	3166968	G	A	0.319464	0.979871	6_1_1	-0.0303257	0.00428188	1.3e-12	0.0640785
rs11759126	6	3369973	T	C	0.643144	0.991486	6_1_2	0.0229201	0.00414715	2.3e-08	0.110213
rs11756659	6	25933932	A	T	0.882856	0.982849	6_2_3	0.0403603	0.00625463	2e-12	0.752197
rs1799945	6	26091179	C	G	0.850303	1	6_2_2	0.137913	0.00559374	2.2e-143	0.140006
rs79220007	6	26098474	T	C	0.922541	0.997966	6_2_1	0.180118	0.00739169	2.3e-135	0.00115325
rs3130901	6	31419065	A	T	0.634247	0.999584	6_2_4	-0.0315719	0.00411496	2.7e-14	0.113852
rs112233623	6	41924998	C	T	0.989949	0.860988	6_3_2	0.181898	0.0216884	3.1e-18	0.728679
rs9349205	6	41925159	G	A	0.748281	1	6_3_1	-0.0534554	0.00454408	1.3e-35	0.858321
rs200980971	6	109582341	T	TA	0.854539	0.990938	6_4_2	0.0445401	0.00627554	2.7e-12	0.771688
rs9487023	6	109590004	A	G	0.551849	0.997902	6_4_1	0.0606571	0.00397414	5e-57	0.154158
rs3813356	6	132834518	C	T	0.549311	0.964879	6_5_1	-0.0222057	0.00403008	3.7e-08	0.290637
rs7775698	6	135418635	C	T	0.739127	1	6_6_1	0.0966506	0.00449678	1.4e-108	0.77846
rs12701265	7	32971236	G	A	0.605789	1	7_1_2	0.0251696	0.00434001	5.6e-09	0.228563
rs4316067	7	33081514	A	G	0.701966	0.986818	7_1_1	-0.0699401	0.00436217	1.9e-62	0.312247
rs801011	7	74236723	C	T	0.290911	0.925292	7_2_1	-0.0326569	0.00453567	1.8e-12	0.168384
rs112908525	7	80305278	T	TGAGGGTTGA	0.569968	0.988676	7_3_1	-0.0350166	0.00403325	1.5e-17	0.161947
rs2178658	7	87122022	G	T	0.740636	0.97366	7_4_1	0.023466	0.00456649	2.9e-08	0.341118
rs739385	7	92682609	G	A	0.850357	0.965498	7_5_1	-0.0309348	0.00562574	1.4e-08	0.462734
rs9801017	7	100236202	G	A	0.376139	0.997518	7_6_1	0.0436834	0.00410509	6.8e-28	0.0322175
rs531909210	7	100239422	G	A	0.99572	0.822423	7_6_2	0.191794	0.0335404	9.8e-09	0.980988
rs11557288	7	129396174	C	G	0.662582	0.979108	7_7_1	0.0225048	0.00423444	2.4e-08	0.286379
rs2980478	8	8088230	T	C	0.523442	0.962592	8_1_1	-0.0406653	0.00404046	1.6e-23	0.159729
rs115849089	8	19912370	G	A	0.884293	0.993002	8_2_1	-0.0556565	0.0062189	1.5e-19	0.845328
rs10503728	8	23421002	A	C	0.589806	0.988078	8_3_1	0.0314067	0.00405731	5.6e-15	0.264942
rs1064807	8	26236978	C	T	0.295889	0.984632	8_4_1	-0.0378075	0.0043839	8.7e-20	0.849429
rs6150565	8	41512581	CACAGCAGAGTCTAT	C	0.465875	0.986138	8_5_2	-0.0267674	0.00404724	5.7e-12	0.0205508
rs4737010	8	41630447	G	A	0.771902	0.986683	8_5_1	-0.0318976	0.00475293	4.5e-13	0.195495
rs2468024	8	98664653	G	A	0.932555	1	8_6_1	0.0721306	0.00790028	7.3e-22	0.690319
rs2954021	8	126482077	A	G	0.493921	0.999424	8_7_1	-0.0422174	0.003966	1.2e-27	0.0725161
rs3210186	8	144682311	G	C	0.384741	0.975719	8_8_1	-0.0298126	0.0041155	1.3e-13	0.641404
rs11784833	8	145063412	T	C	0.617979	0.997178	8_8_2	0.0231467	0.00408883	6.8e-09	0.0893617
rs10739069	9	4863305	T	A	0.793488	0.992747	9_1_1	-0.0407602	0.00492124	2.1e-18	0.125557
rs34595852	9	88878372	A	ACT	0.344299	0.996489	9_2_1	0.0228525	0.00418548	3.7e-08	0.575002
rs142079905	9	91497782	C	T	0.94442	0.981528	9_3_1	0.0588308	0.00873022	2.5e-11	0.315745
rs9409793	9	97271155	C	G	0.38916	0.964408	9_4_1	0.0220857	0.00414282	2.9e-08	0.465582
rs144721045	9	114686305	T	A	0.986324	0.965624	9_5_1	-0.124208	0.0173759	3.1e-13	0.166141
rs10988207	9	131867130	G	A	0.316725	0.980261	9_6_1	-0.0384754	0.00430473	3.7e-20	0.483053
rs73660574	9	135860412	G	A	0.959238	0.82727	9_7_2	0.111407	0.0109871	2.8e-25	0.609137
rs8176644	9	136149150	C	T	0.941272	0.993066	9_7_1	0.0874124	0.00843587	8.6e-27	0.160589
rs635634	9	136155000	C	T	0.814835	1	9_7_4	-0.0305428	0.00514375	1.9e-09	0.958466
rs2157770	9	136921464	A	G	0.714828	0.993552	9_7_3	0.0321037	0.00439421	1.2e-13	0.614972
rs3124592	9	139393162	G	A	0.454114	0.963306	9_8_1	0.0233705	0.00406233	5.9e-09	0.697806
rs11258564	10	13772905	A	G	0.659263	0.970928	10_1_1	-0.0246085	0.0042517	9.2e-10	0.470665
rs4332427	10	24858390	A	G	0.754114	0.978307	10_2_1	-0.0753708	0.00465131	3.8e-62	0.24907
rs77677521	10	45952896	C	G	0.976905	0.980755	10_3_2	-0.106339	0.0133483	1.2e-15	0.229611
rs34156328	10	46003259	G	GA	0.756324	0.915996	10_3_1	-0.0373331	0.00482499	2e-15	0.202816
rs67183237	10	96245896	C	T	0.516241	0.934356	10_4_1	-0.029474	0.00410571	6.4e-13	0.167294
rs4980169	10	124692586	A	G	0.421959	0.998359	10_5_1	0.0241974	0.00402646	4.3e-10	0.239708
rs374499153	11	258023	T	C	0.882158	0.948507	11_1_1	-0.049643	0.00630792	3e-15	0.999923
rs12292724	11	4176671	T	A	0.637648	0.995993	11_2_2	-0.0255718	0.00413207	2.7e-10	0.881373
rs4910735	11	5258852	G	A	0.530699	0.980311	11_2_1	-0.0254825	0.00400493	2.4e-11	0.250196
rs17462448	11	16359567	G	A	0.917904	0.991397	11_3_1	-0.0923673	0.00727022	9.1e-41	0.27049
rs113104107	11	44594170	CAA	C	0.746637	0.992208	11_4_1	0.038458	0.00457428	6.4e-17	0.0385673
rs174559	11	61581656	G	A	0.71779	0.998635	11_5_1	0.0588124	0.00439851	4.7e-44	0.366356
rs11606601	11	65354439	C	G	0.506685	0.984257	11_6_1	0.0385813	0.00399764	1.1e-22	0.843823
rs717662	11	100493995	C	T	0.892261	0.978599	11_7_1	0.0500558	0.00645635	1.8e-16	0.946097
rs66505542	11	116623213	TA	T	0.140241	0.996581	11_8_1	-0.042759	0.0057358	2.4e-14	0.74537
rs7115329	11	122949545	C	G	0.959794	0.994229	11_9_1	-0.060981	0.0101214	1.5e-09	0.0771327
ss1388030555	12	7153079	C	CT	0.922444	0.976582	12_1_1	0.0456594	0.00751569	1.3e-10	0.0901109
rs35173156	12	50968330	T	C	0.804161	0.981809	12_2_1	-0.0330374	0.00504926	2.2e-11	0.661082
rs35979828	12	54685880	C	T	0.931441	1	12_3_2	0.0736574	0.00790539	3.2e-21	0.427348
rs79755767	12	54698408	G	A	0.899944	0.972338	12_3_1	0.075313	0.00671957	9e-30	0.686277
rs117444538	12	57414995	T	C	0.964593	0.977483	12_4_1	-0.0615962	0.0108769	4.9e-08	0.772677
rs3742015	12	110017125	T	C	0.560581	0.99856	12_5_1	-0.0227007	0.00400122	2.6e-08	0.798347
rs55730005	12	121157536	C	A	0.613026	0.991257	12_6_1	-0.0328067	0.00409171	6.8e-17	0.834371
rs12318272	12	132533737	A	G	0.975397	0.987886	12_7_1	0.0914211	0.0128575	9.5e-14	0.050236
rs76533333	13	113352916	A	G	0.910073	0.993685	13_1_1	-0.0634789	0.00695348	8.1e-22	0.313652
rs368865	13	113479820	A	G	0.275684	1	13_1_3	-0.0247561	0.00444184	2.4e-09	0.0942451
rs6602909	13	114551993	T	C	0.674997	0.991901	13_1_2	-0.0256522	0.00425852	4.5e-10	0.0969803
rs8013143	14	23494277	A	G	0.723818	1	14_1_1	-0.0836895	0.00443742	2.2e-85	0.893731
rs11845708	14	23515375	C	T	0.83263	0.981496	14_1_2	-0.0300641	0.00543941	1.9e-08	0.0758617
rs35995659	14	58753773	C	CTT	0.240391	0.991142	14_2_1	-0.0359976	0.0046493	9.8e-16	0.518249
rs112329286	14	64239877	T	TTTTA	0.840356	0.986869	14_3_2	-0.0338632	0.00545345	4.1e-10	0.0581633
rs11851199	14	65256188	A	G	0.926803	0.977545	14_3_3	0.0465662	0.00770702	9.2e-10	0.399923
rs17767662	14	65280824	C	T	0.71094	0.988242	14_3_1	-0.0442157	0.00439782	3.1e-26	0.733167
rs55796722	14	70328410	A	T	0.167105	0.973749	14_4_1	0.03938	0.00539046	5.1e-12	0.148278
rs2806029	14	73431460	A	G	0.0245549	0.995343	14_5_2	-0.0781317	0.0128591	1.1e-10	0.55949
rs7148979	14	74547318	T	A	0.878607	0.996297	14_5_1	0.0745125	0.00606653	4.2e-38	0.328442
rs12883091	14	102669022	G	A	0.801987	0.994148	14_6_1	-0.0310194	0.00499709	1.2e-09	0.96234
rs6493544	15	31537559	C	G	0.118664	0.97554	15_1_1	0.0309535	0.00621207	3.2e-08	0.771663
rs12164905	15	40300691	G	T	0.811888	0.990156	15_2_1	0.0398081	0.00509493	7.3e-16	0.0560665
rs71297631	15	56662172	C	CTGTTA	0.565537	0.998169	15_3_1	-0.0285392	0.00400719	9e-14	0.61646
rs3169166	15	78563103	A	C	0.584138	1	15_4_1	0.0503532	0.00401995	6e-38	0.157203
rs2867933	15	78574787	C	T	0.110545	0.994505	15_4_2	-0.0520158	0.00696282	2.7e-13	0.00870195
rs8028409	15	91506422	A	T	0.870925	0.985119	15_5_1	-0.129599	0.00595593	1.2e-110	0.0478545
rs7194649	16	215106	C	A	0.895115	0.946113	16_1_1	0.0440295	0.00666179	2e-11	0.33963
rs767932573	16	357299	G	A	0.998845	0.737684	16_1_2	-0.437753	0.0667903	1.7e-10	0.760951
rs8050500	16	31404571	T	C	0.554197	1	16_2_1	0.0298409	0.00399134	1.4e-14	0.710911
rs71138029	16	50108892	C	CA	0.288972	0.995482	16_3_1	-0.0313909	0.00438172	6.5e-13	0.736593
rs28429148	16	53798319	G	A	0.567014	0.961613	16_4_1	-0.0211418	0.00409279	2.4e-08	0.753953
rs147333341	16	68742544	CT	C	0.744413	0.965493	16_5_1	-0.0361636	0.00462882	1.4e-16	0.0609228
rs8067342	17	21156860	C	T	0.681291	1	17_1_1	0.0221496	0.00425834	4e-08	0.371636
rs12946844	17	27170156	C	T	0.794447	0.991879	17_2_1	0.07867	0.00491816	5e-59	0.932246
rs78079206	17	31298323	G	A	0.849924	0.993433	17_3_1	0.0491695	0.00557178	5.8e-19	0.232095
rs1046321	17	33902284	T	C	0.546075	0.984309	17_4_1	-0.0269867	0.00400592	3.7e-12	0.324595
rs2306589	17	34848874	T	C	0.471515	0.992461	17_4_2	0.0284982	0.00398993	3e-11	0.275658
rs13306780	17	42329004	A	C	0.297723	0.975617	17_5_2	-0.0368681	0.00439622	3e-17	0.988151
rs11654745	17	44131096	G	A	0.609154	0.987262	17_5_3	0.0227274	0.00454626	4.7e-08	0.473045
rs555203107	17	44324572	A	G	0.770486	0.988032	17_5_1	-0.0516895	0.00473765	7.7e-28	0.782334
rs201184664	17	57950619	T	TTG	0.790759	0.978138	17_6_1	-0.0342407	0.00489378	1.1e-13	0.791046
rs2302783	17	66447073	T	C	0.285014	1	17_7_1	-0.0272749	0.00439114	2.2e-10	0.509015
rs429216	17	76126204	T	G	0.846934	0.986586	17_8_2	-0.0396972	0.00556579	2.3e-12	0.808598
rs144204502	17	76183233	C	T	0.987464	0.947439	17_8_1	0.119641	0.018213	5.4e-12	0.482457
rs3208787	17	79525660	A	G	0.835882	1	17_9_2	0.0288766	0.00536978	8e-09	0.628916
rs9898189	17	80480516	C	G	0.355225	0.991017	17_9_1	-0.0307176	0.00415971	5e-15	0.377361
rs12963943	18	43805661	C	T	0.264803	0.977917	18_1_1	-0.0861728	0.00454446	5.3e-85	0.188896
rs11877350	18	43867311	G	A	0.569133	1	18_1_2	-0.0345404	0.00456373	1.3e-13	0.57555
rs67806247	19	1014537	ACGTGATGGGG	A	0.57861	0.985796	19_1_1	0.0238078	0.00404123	1.9e-09	0.962089
rs62130978	19	4429007	C	T	0.746111	0.999299	19_2_1	-0.0336982	0.00455805	4.1e-14	0.412308
19:7229019_C_CGGAT	19	7229019	C	CGGAT	0.693138	0.919967	19_3_1	-0.0243641	0.00448647	2.8e-08	0.708856
rs7252007	19	10687757	T	C	0.139229	0.995863	19_4_1	0.0378013	0.00575267	4.5e-12	0.437294
rs12978807	19	11292811	T	C	0.920075	0.960078	19_4_3	0.0451593	0.00745346	5.6e-10	0.0297052
rs11672387	19	12981253	C	G	0.782896	0.993015	19_4_2	-0.0291897	0.00482045	4.9e-10	0.791637
rs11881955	19	17254508	A	G	0.6097	0.994014	19_5_1	-0.0302386	0.00408398	3.4e-14	0.615055
rs4808955	19	19552413	T	C	0.651648	0.998101	19_6_1	0.0331526	0.00417867	2.4e-15	0.888106
rs10405535	19	33072085	A	G	0.315823	0.923849	19_7_1	0.0284022	0.0044353	2.7e-10	0.359904
rs34540877	19	33090271	T	C	0.973084	0.976395	19_7_2	0.0684043	0.0125064	4e-08	0.314356
rs373214016	19	35775509	G	GT	0.767053	0.957892	19_8_2	-0.0264132	0.00479915	1.6e-08	0.525118
rs570714594	19	35776481	C	T	0.998654	0.857433	19_8_1	0.324916	0.0582775	3.6e-09	0.180553
rs445925	19	45415640	G	A	0.891292	1	19_9_2	-0.0631036	0.00638577	5.4e-25	0.45958
rs4420638	19	45422946	A	G	0.810236	1	19_9_1	0.0512579	0.00505929	1.9e-25	0.435639
rs556052	19	49377436	G	C	0.666981	1	19_10_1	0.0283128	0.00420197	8.5e-12	0.00730234
rs10410869	19	58141281	G	T	0.894889	0.987716	19_11_1	0.0398117	0.00651341	2.7e-11	0.473028
rs910889	20	31104950	T	C	0.779883	0.990594	20_1_1	-0.0460589	0.0048183	1.2e-21	0.958528
rs548223088	20	35663519	T	TAA	0.853128	0.984217	20_2_1	0.039853	0.00566018	3.9e-13	0.0608642
rs6014993	20	55991637	A	G	0.511863	0.979845	20_3_1	0.0259103	0.00400946	1.5e-10	0.883467
rs2834259	21	35133091	C	T	0.654374	0.994241	21_1_1	-0.0370149	0.00420162	1.5e-19	0.711372
rs741951	21	46269526	G	A	0.849799	0.99253	21_2_1	-0.0336708	0.00558182	1.4e-10	0.617669
rs878825	22	21982249	T	C	0.806997	0.995121	22_1_1	-0.0292727	0.00502984	1.2e-09	0.842778
rs9608698	22	29134559	G	C	0.448079	0.983954	22_2_3	0.0240875	0.00402378	3.1e-09	0.572107
rs5749111	22	30894943	T	A	0.765569	0.979934	22_2_2	-0.0374969	0.00472403	2.5e-16	0.493372
rs28715	22	31730169	C	T	0.511107	0.986943	22_2_4	-0.0235931	0.0039849	9.4e-10	0.24362
rs5754120	22	32899858	T	C	0.394363	0.985577	22_2_1	-0.0367385	0.00408262	9.7e-20	0.371817
rs855791	22	37462936	A	G	0.439348	1	22_3_1	0.118806	0.00399204	1.2e-204	0.823511
rs881144	22	37471290	G	A	0.877029	1	22_3_2	-0.039784	0.00634941	4.2e-11	0.437275
rs738409	22	44324727	C	G	0.784517	1	22_4_1	0.0288866	0.00482279	6.2e-09	0.192911
rs140522	22	50971266	T	C	0.326818	1	22_5_1	0.0320085	0.00422621	1.4e-14	0.464049
